# Supplementary material
Source: MDPI journal article supplement (https://www.mdpi.com/2075-163X/14/2/188)
Supplement: s1 [file s1]

## Supplementary materials

for Kepezhinskas et al. "Iron-titanium oxide-apatite-sulfide-sulfate microinclusions in gabbro and adakite from the Russian Far East indicate possible magmatic links to IOA and IOCG deposits"

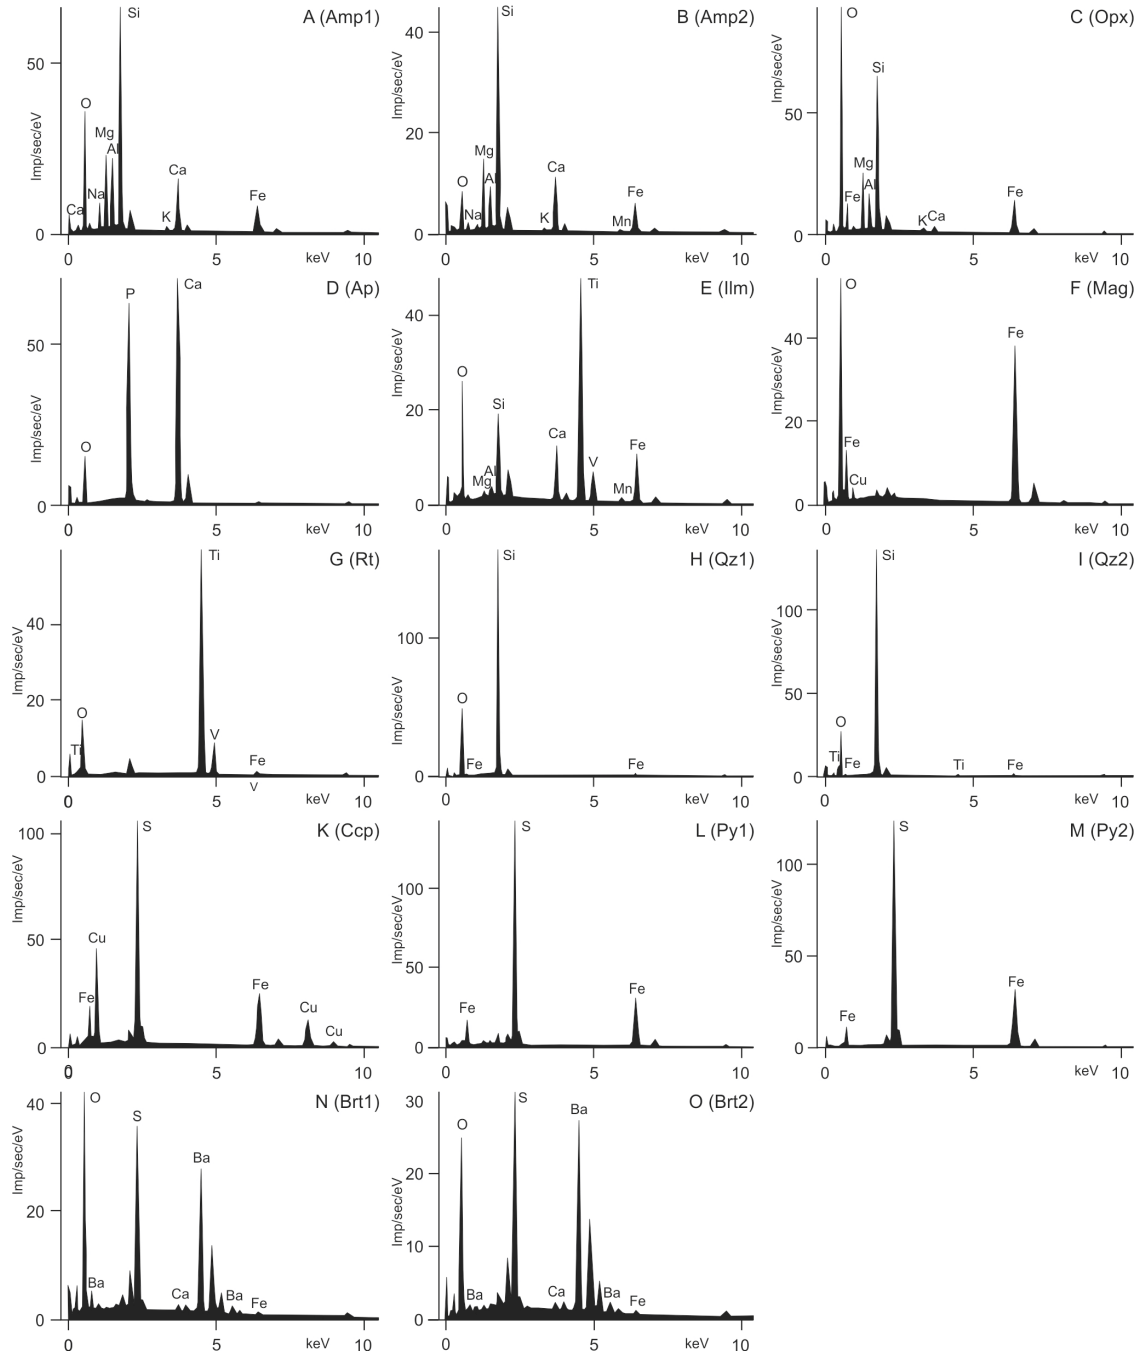

Figure S1. SEM-EDS spectra for mineral phases in Figure 4 a and b. Mineral abbreviations: Amp – amphibole, Opx – orthopyroxene, Ap – apatite, Ilm – ilmenite, Mag – magnetite, Rt – rutile, Qz – quartz, Ccp – chalcopyrite, Py – pyrite, Brt – barite.
